# Supplementary material
Source: PubMed Central journal article supplement (PMC3071083)
Supplement: neo1304_0348SD1.pdf [file neo1304_0348SD1.pdf]

**Table W1.** List of Primary Antibodies Used for Western Blot Analysis.

| Antibody                | Catalog ID | Manufacturer Information            |
|-------------------------|------------|-------------------------------------|
| APC                     | OP44       | Merck KGaA, Darmstadt, Germany      |
| Axin2                   | 76G6       | NEB, Ontario, Canada                |
| $\beta$ -Actin          | A1978      | Sigma, St Louis, MO                 |
| EGFR                    | sc-03      | Santa Cruz, CA                      |
| GAPDH                   | 14C10      | Cell Signaling, Danvers, MA         |
| Lamin A/C               | V3001      | Biomed Corporation, Foster City, CA |
| p53                     | V1003      | Biomed Corporation, Foster City, CA |
| Phospho-EGFR (Y1173)    | sc-101668  | Santa Cruz, CA                      |
| Phospho-ERK (T202/Y204) | 9101       | NEB, Ontario, Canada                |

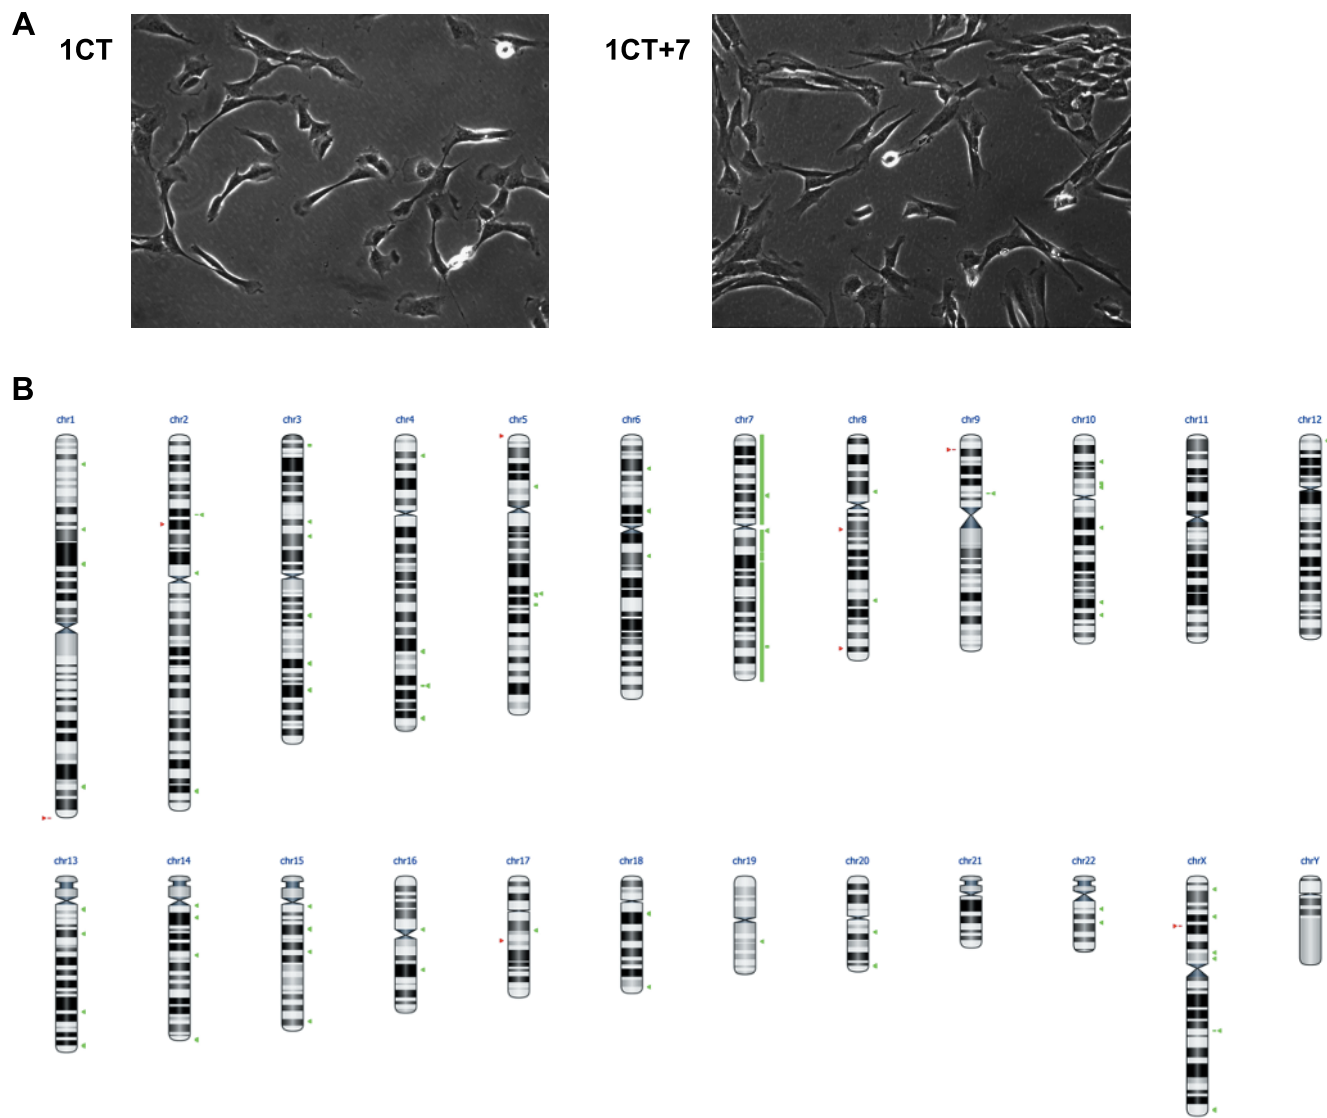

**Figure W1.** (A) Phase-contrast images of cell morphology for both cell types. (B) Array Comparative Genomics Hybridization analysis reveals no other large gains or losses of chromosomal segments other than amplification of chromosome 7 in HCEC 1CT+7.

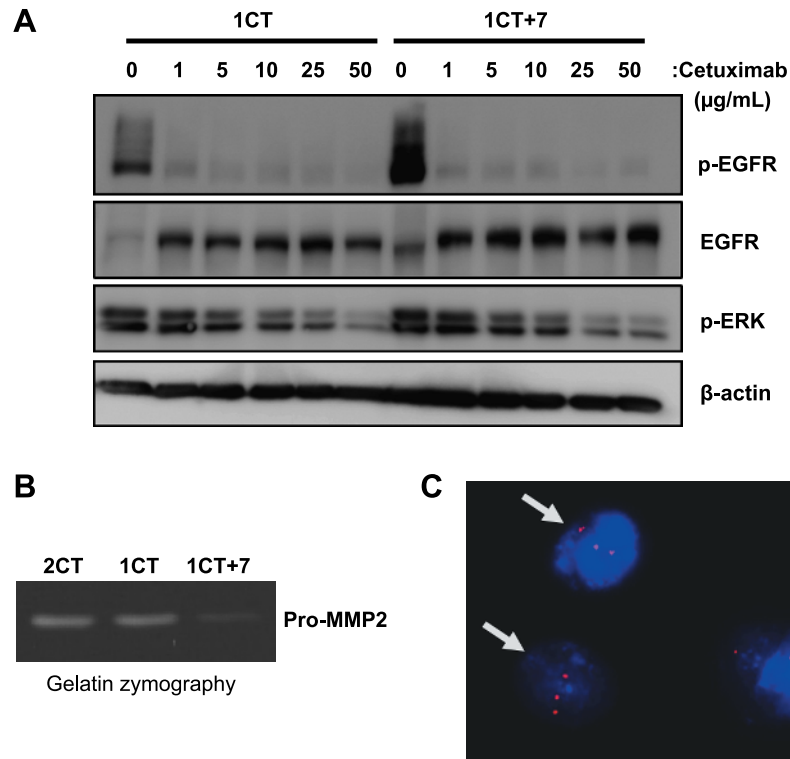

**Figure W2.** (A) Cetuximab can effectively inhibit EGFR phosphorylation in both 1CT and 1CT+7 cells. Cells were treated with varying concentrations of cetuximab for 1 hour before stimulation with 5 ng/ml EGF for 15 minutes. (B) Gelatin zymography detects lower pro-MMP-2 levels secreted by HCEC 1CT+7 than in HCEC 1CT or 2CT. (C) FISH analysis using chromosome 20-specific probes shows 20% (7/35 cells by GTG banding) trisomy 20 emergence from HCEC 1CTRP+7 populations.

**Table W2.** List of Polymerase Chain Reaction Primers Used for DNA Sequencing.

| Sequenced Region | Direction | Primer Sequence (5'-3')     |
|------------------|-----------|-----------------------------|
| APC-Cluster 1    | Reverse   | GCTGGATTGGTTCTAGGG          |
|                  | Forward   | TCCTTCATCACAGAAACAGT        |
| APC-Cluster 2    | Reverse   | GATGACTTTGTTGGCATGGCA       |
|                  | Forward   | GGTCAGCTGAAGATCCTGTG        |
| EGFR-TK Domain   | Reverse   | GCCCTGCTGTGGGATGAGGTACTC    |
|                  | Forward   | GGAGAAGCTCCCAACCAAGCTCTCTTG |
| KRAS-Ex1         | Reverse   | GAATGGTCCTGCACCAGTAA        |
|                  | Forward   | GTGTGACATGTTCTAATATAGTCACA  |
| p53-Ex5          | Reverse   | CCAGCCCTGTCGTCTCTCCA        |
|                  | Forward   | GCTGCCGTGTTCCAGTTGC         |
| p53-Ex6          | Reverse   | GCCACTGACAACCACCTTA         |
|                  | Forward   | GGCCTCTGATTCTCTACTCTGA      |
| p53-Ex7          | Reverse   | AGTGTGCAGGGTGCAAGTG         |
|                  | Forward   | TGCCACAGGTCTCCCAAGG         |
| p53-Ex8          | Reverse   | ATAACTGCACCCTTGGTCTC        |
|                  | Forward   | CCTTACTGCCTCTTGCTTCT        |

Regions sequenced here were all normal in the HCEC 1CT line.
